# Supplementary material for: Antiproliferative Activity of Pt(IV) Conjugates Containing the Non-Steroidal Anti-Inflammatory Drugs (NSAIDs) Ketoprofen and Naproxen
Source: Int J Mol Sci. 2019 Jun 24;20(12):3074. doi: 10.3390/ijms20123074 (PMC6627341; doi:10.3390/ijms20123074)
Supplement: Supplementary file 1 [file ijms-20-03074-s001.pdf]

# **Antiproliferative activity of Pt(IV) conjugates containing the Non-Steroidal Anti-Inflammatory Drugs (NSAIDs) ketoprofen and naproxen**

Mauro Ravera, Ilaria Zanellato, Elisabetta Gabano, Beatrice Rangone, Marco Coppola, Elena Perin,  
Domenico Osella\*

*Dipartimento di Scienze e Innovazione Tecnologica, Università del Piemonte Orientale, Viale Michel 11,  
15121 Alessandria (Italy)*

## **SUPPLEMENTARY MATERIAL**

### **CONTENT:**

**Figure S1.** Sketch of the complexes under investigation.

**Figure S2-Figure S3.** NMR characterisation of (*RS*)-2-[3-(benzoyl)phenyl]propanoyl chloride

**Figure S4-Figure S5.** NMR characterisation of 2-(6-metoxynaphtalen-2-yl)propanoyl chloride

**Figure S6-Figure S9.** MS and NMR characterisation of complex **2**

**Figure S10-Figure S13.** MS and NMR characterisation of complex **3**

**Figure S14-Figure S17.** Residual viability (resazurin reduction assay) data of HCT 116 and HT-29 cells after treatment with cisplatin, NSAIDs and a cisplatin : NSAIDs 1 : 500 mixture. These data were used to obtain the Combination Index (CI) value with the method of Chou and Talalay.

**Figure S18-Figure S19.** Representative pictures of HCT 116 and A-549 cells 24 h after a treatment with **2** and **3**.

**Table S1.** Genes analyzed by means of Quantitative Reverse Transcription PCR (RT-qPCR).

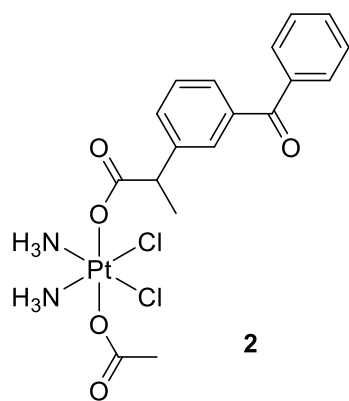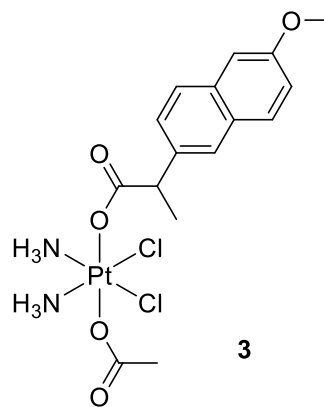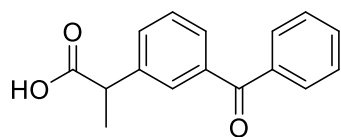

ketoprofen

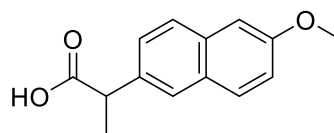

naproxen

**Figure S1.** Sketch of the complexes under investigation.

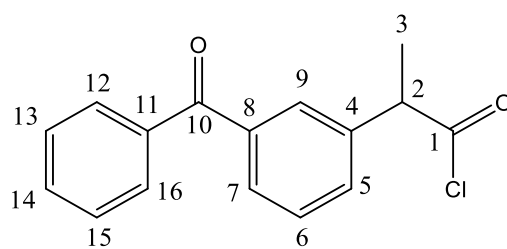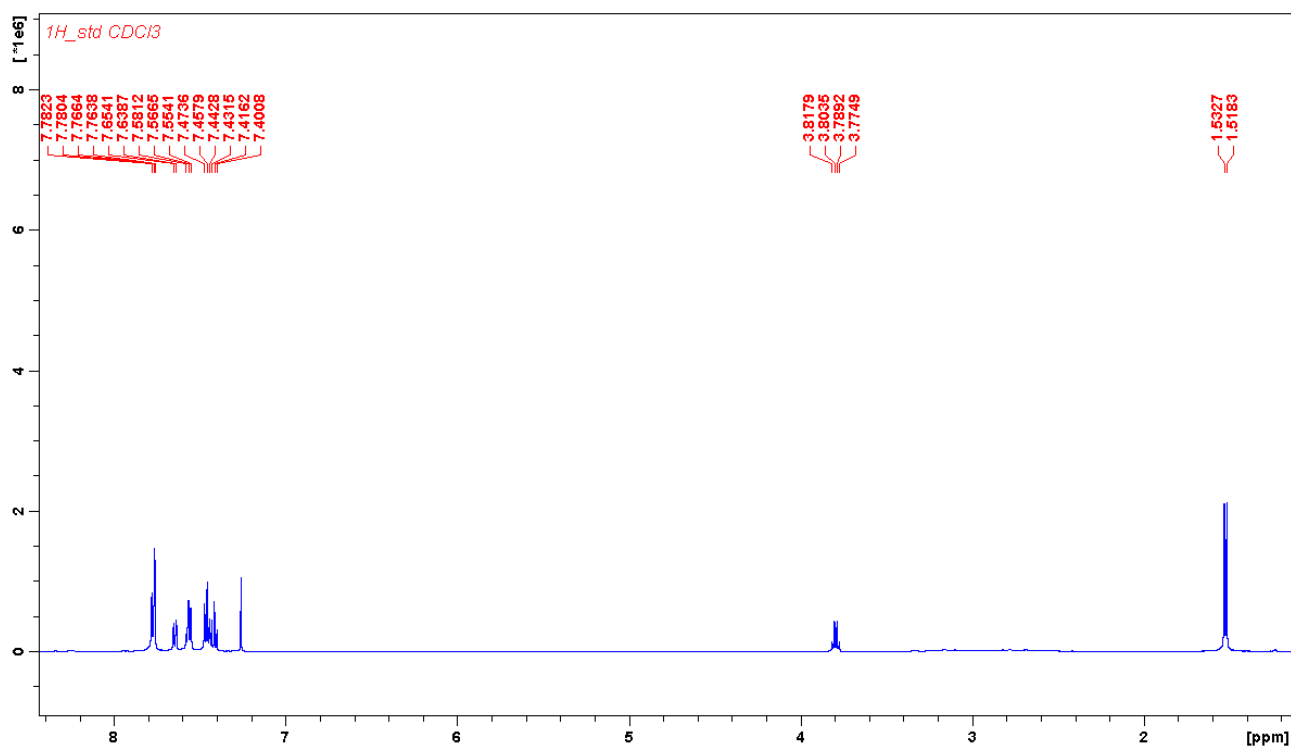

**Figure S2.**  $^1\text{H}$ -NMR spectrum of (*RS*)-2-[3-(benzoyl)phenyl]propanoyl chloride in  $\text{CDCl}_3$ .

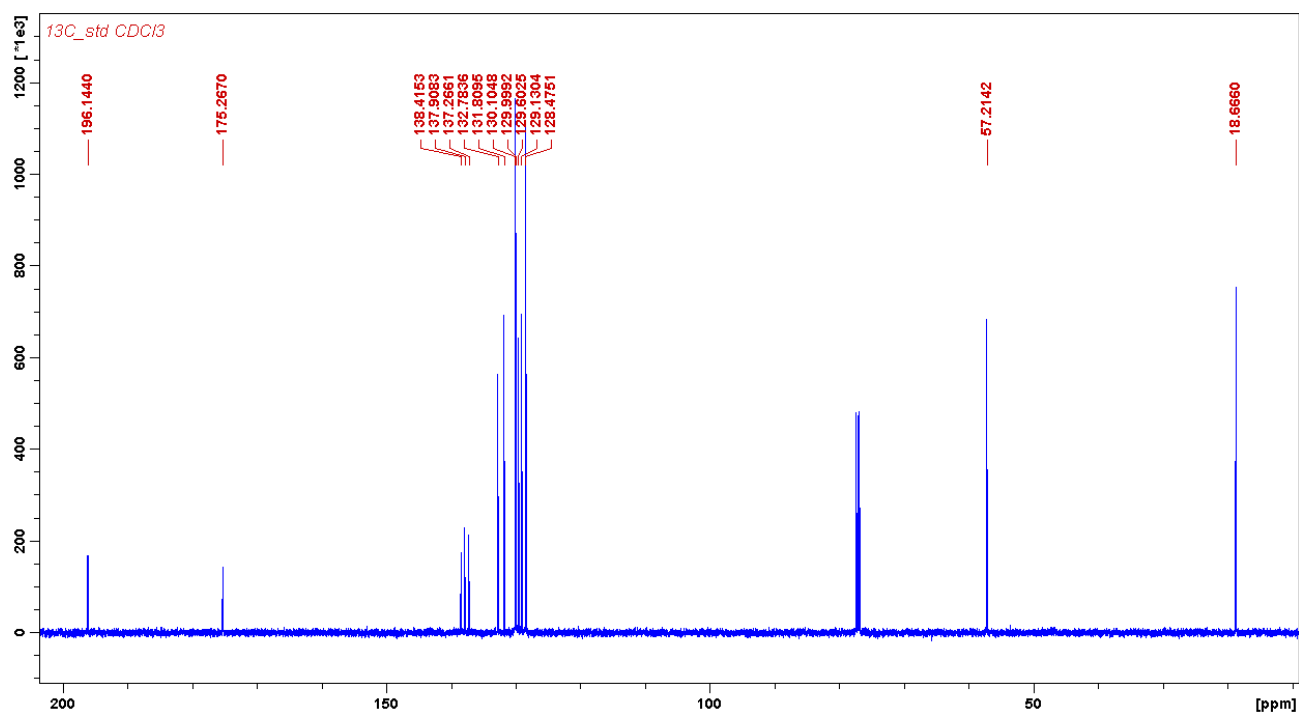

**Figure S3.** <sup>13</sup>C-NMR spectrum of (RS)-2-[3-(benzoyl)phenyl]propanoyl chloride in CDCl<sub>3</sub>.

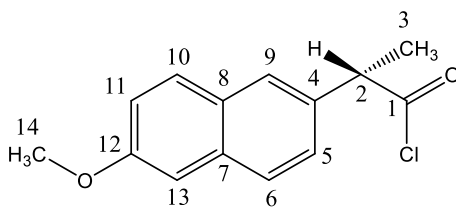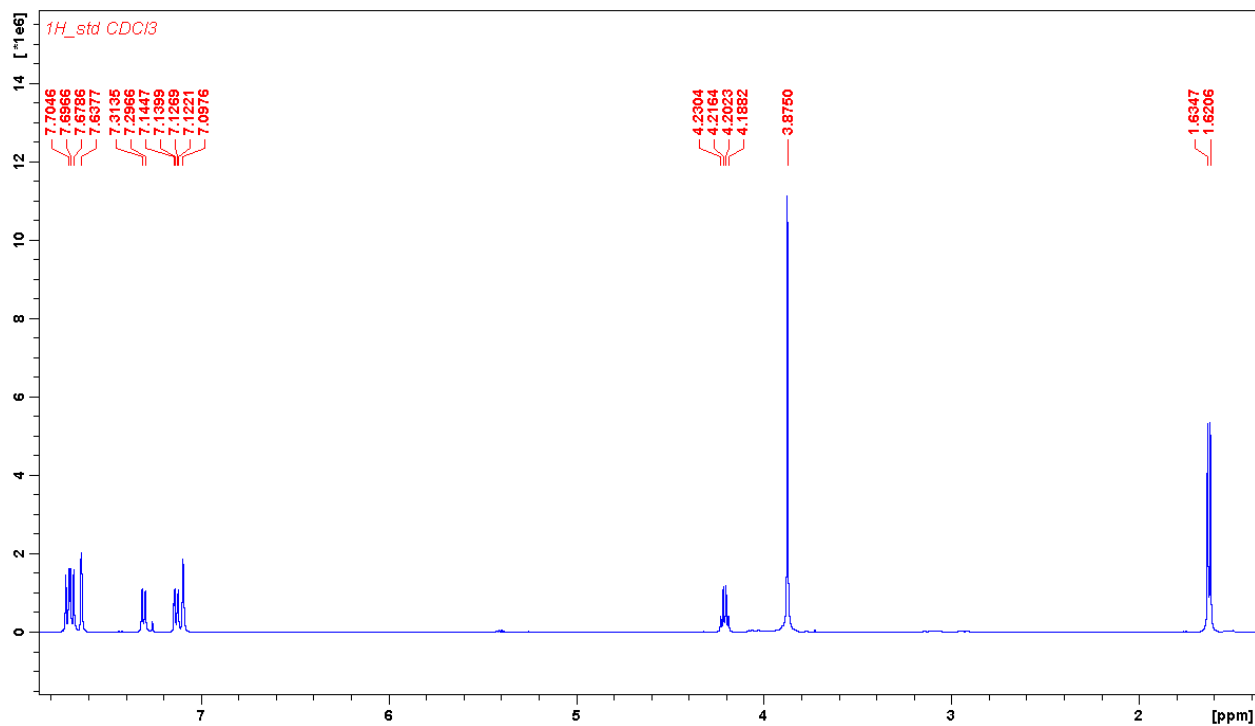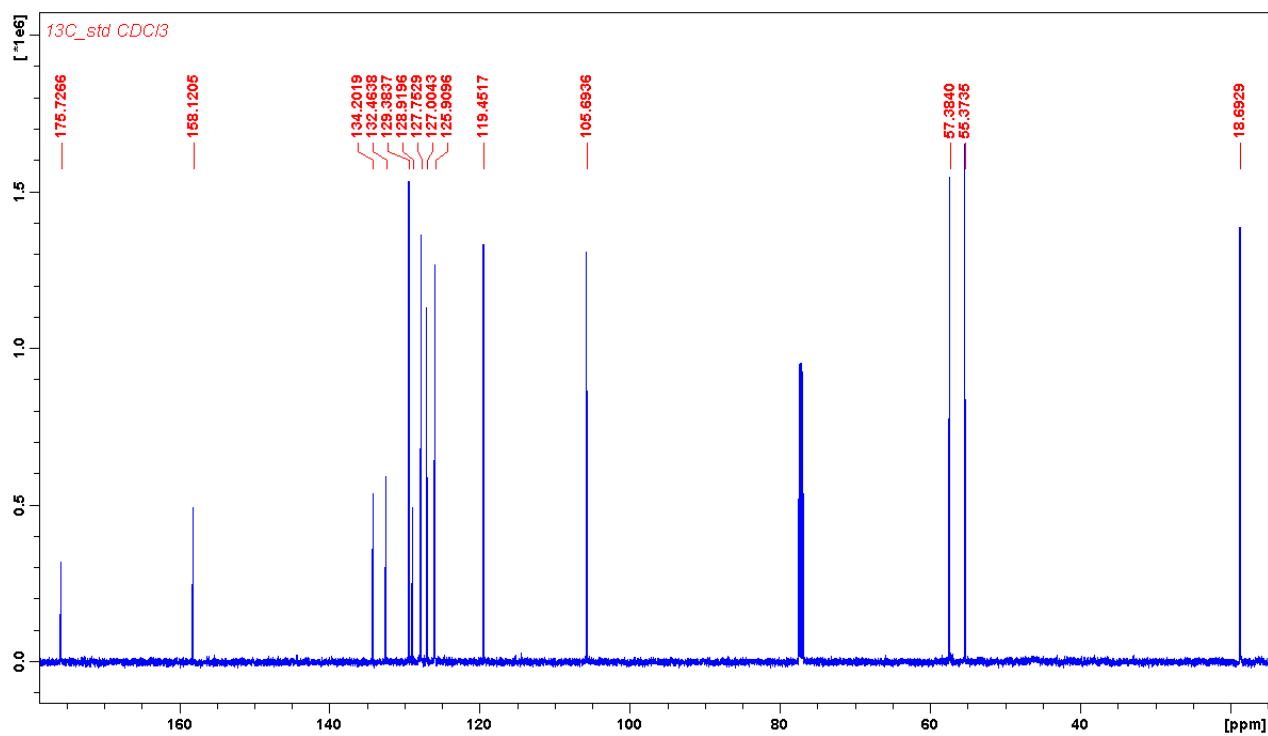

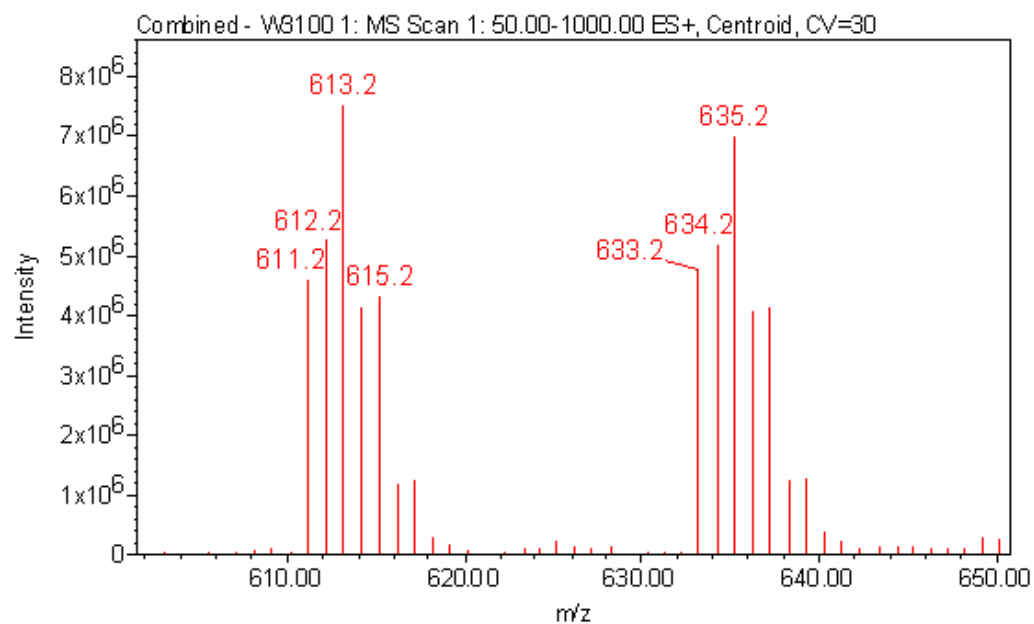

**Figure S6.** ESI-MS spectrum of complex **2**

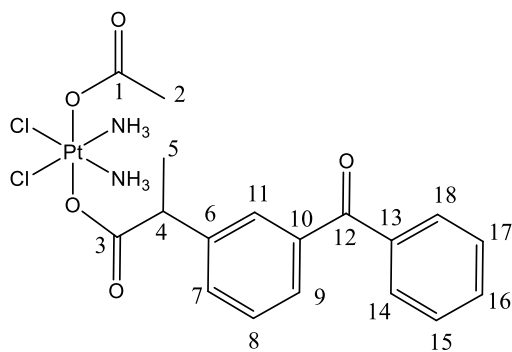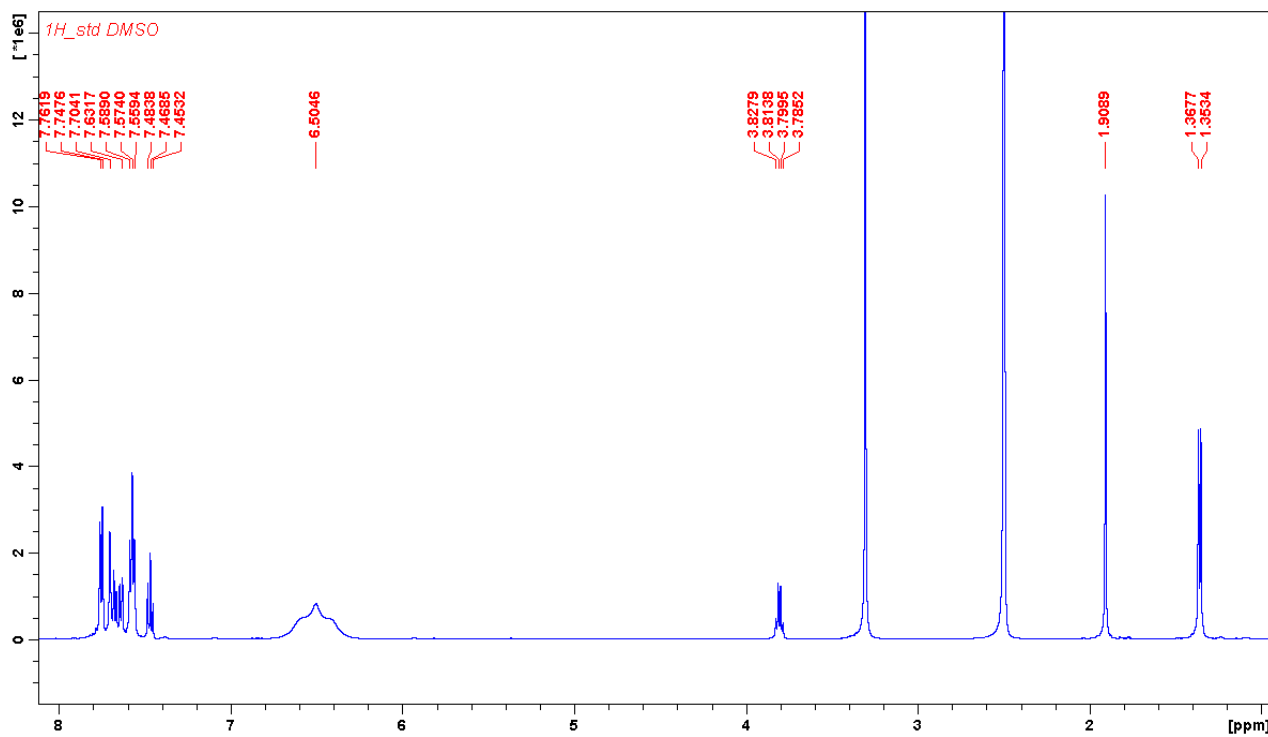

**Figure S7.** <sup>1</sup>H-NMR spectrum of complex **2** in DMSO-d<sub>6</sub>.

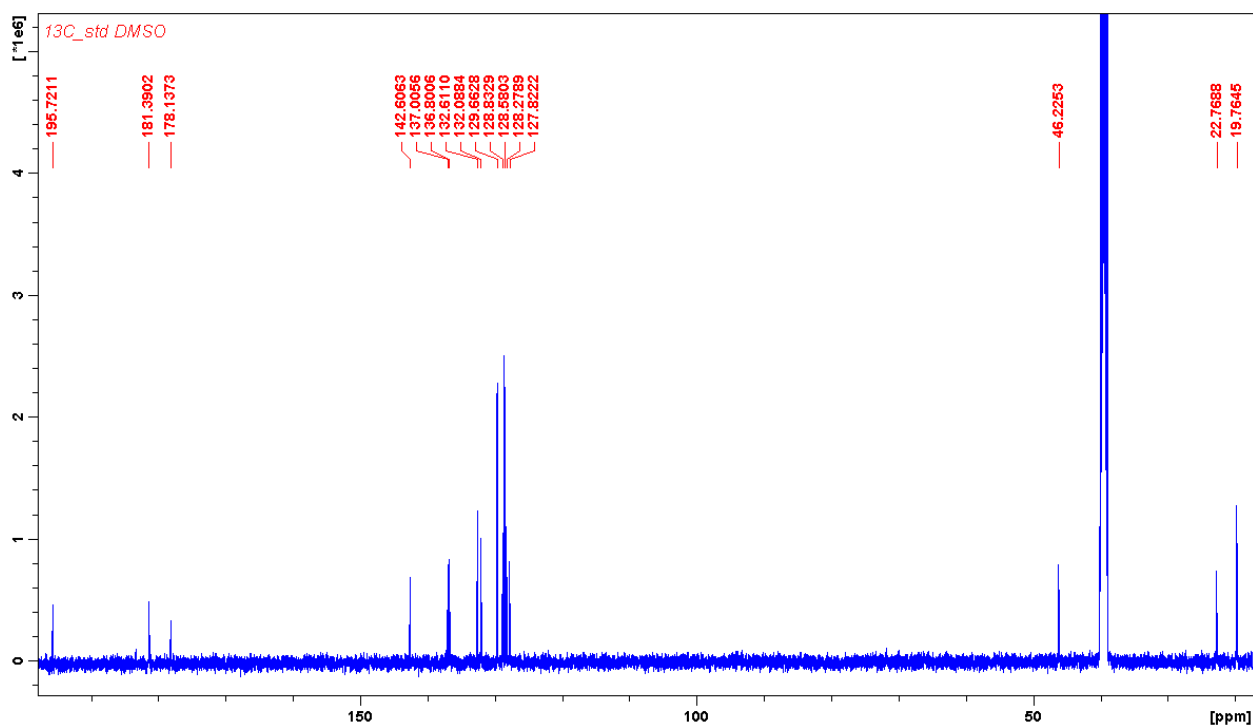

**Figure S8.** <sup>13</sup>C-NMR spectrum of complex **2** in DMSO-d<sub>6</sub>

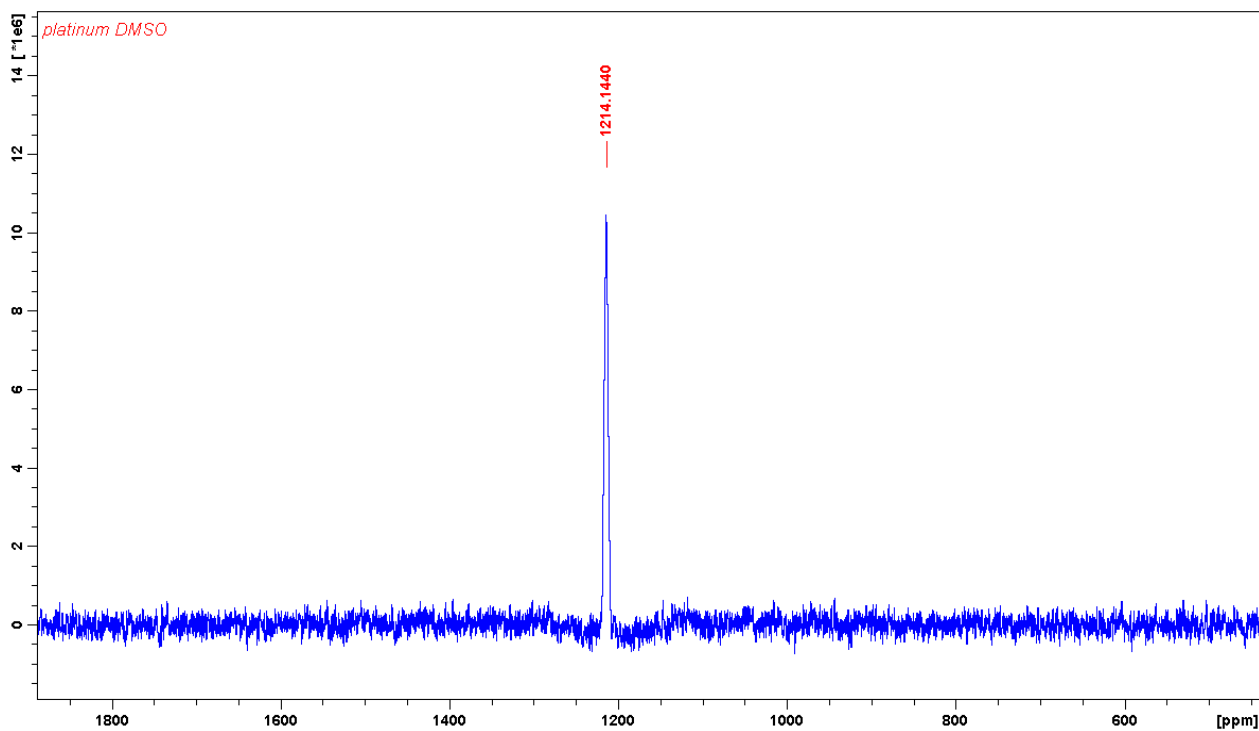

**Figure S9.** <sup>195</sup>Pt-NMR spectrum of complex **2** in DMSO-d<sub>6</sub>

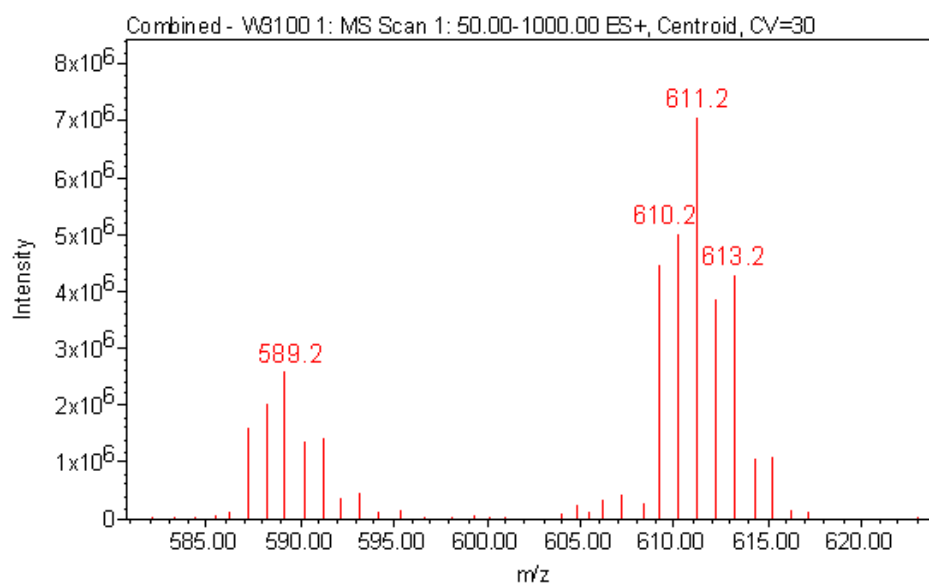

**Figure S10.** ESI-MS spectrum of complex **3**

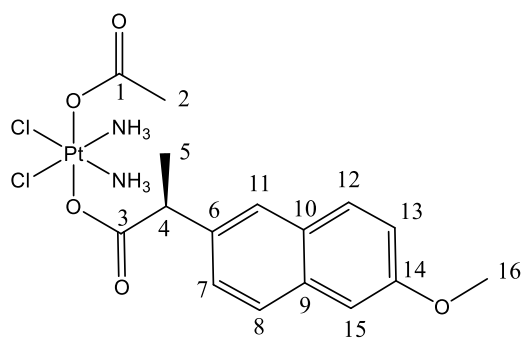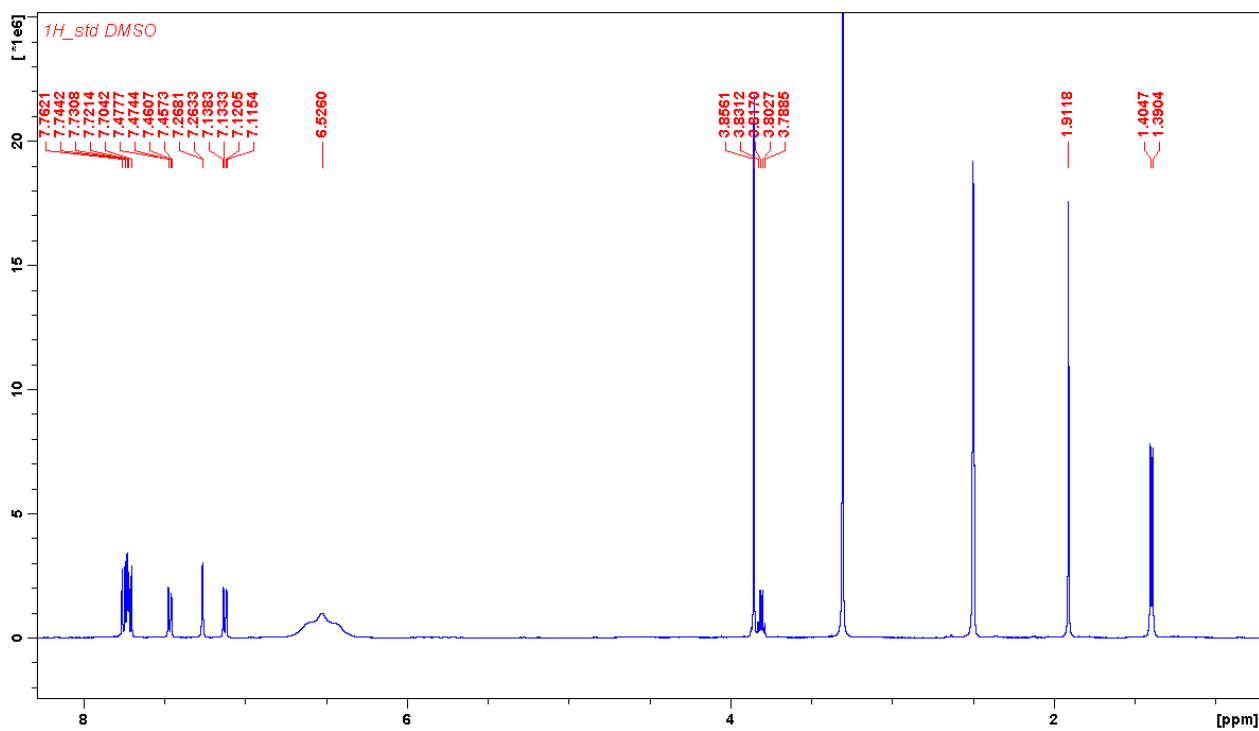

**Figure S11.**  $^1\text{H}$ -NMR spectrum of complex **3** in  $\text{DMSO-d}_6$ .

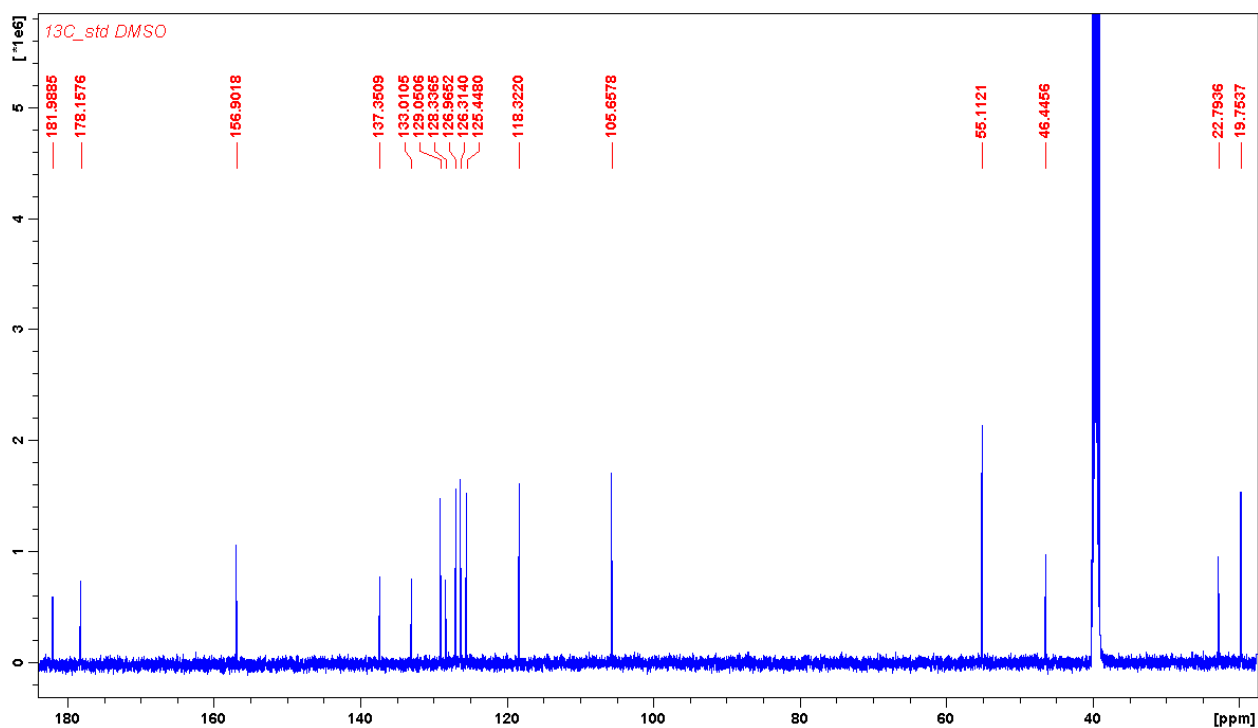

**Figure S12.**  $^{13}\text{C}$ -NMR spectrum of complex **3** in  $\text{DMSO-d}_6$ .

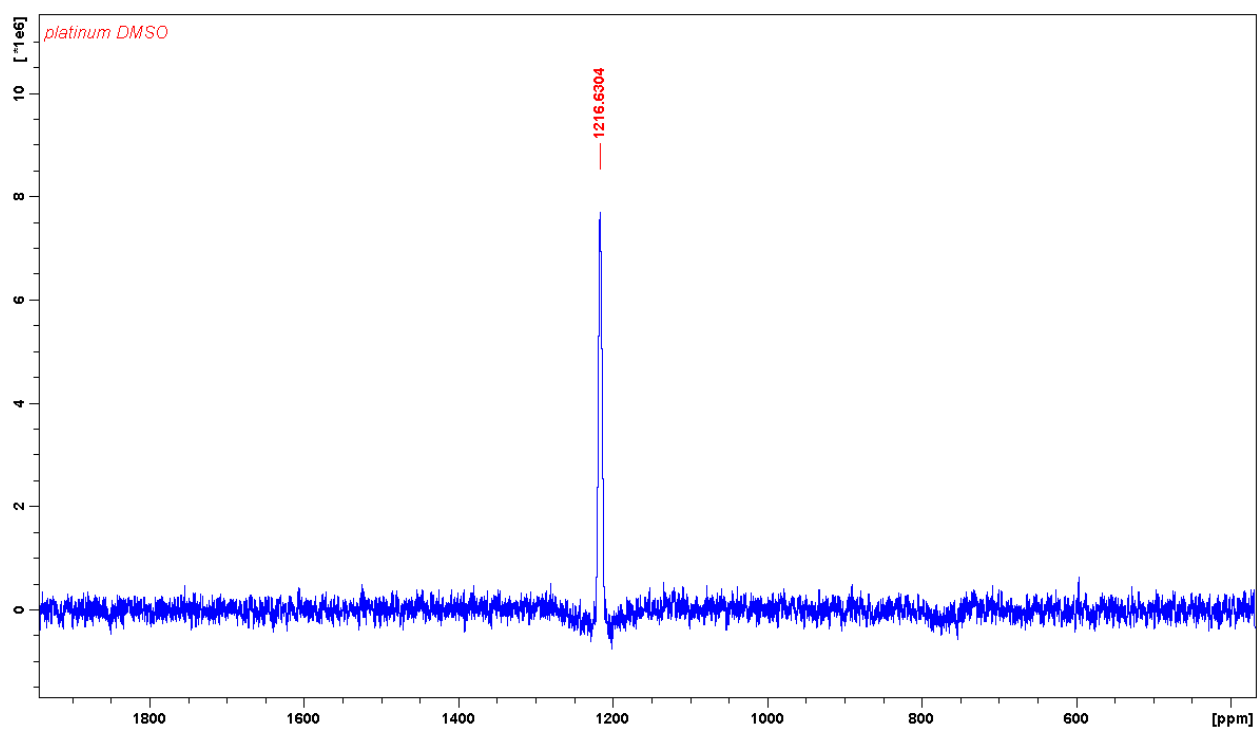

**Figure S13.**  $^{195}\text{Pt}$ -NMR spectrum of complex **3** in  $\text{DMSO-d}_6$ .

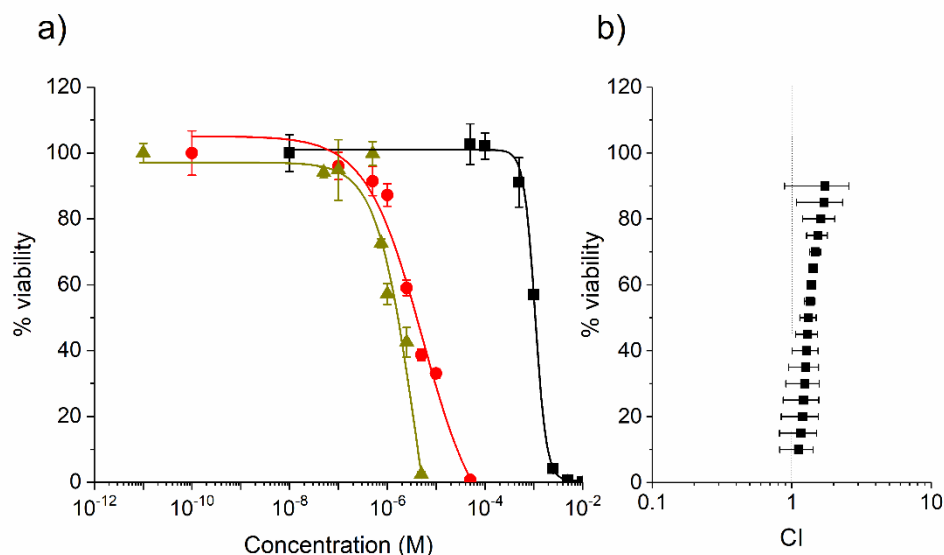

**Figure S14.** HCT116 cells were treated for 72 h with cisplatin (red dots), ketoprofen (black squares) or a cisplatin : ketoprofen mixture (in a fixed 1:500 ratio, according to their respective  $IC_{50}$  values, green triangles). a) Residual viability was assessed by means of the resazurin reduction assay and data were fitted with a four-parameter function. b) Residual viability data of the 1:500 mixture were compared to obtain the Combination Index (CI) value with the method of Chou and Talalay (equation for non-mutually exclusive drugs).

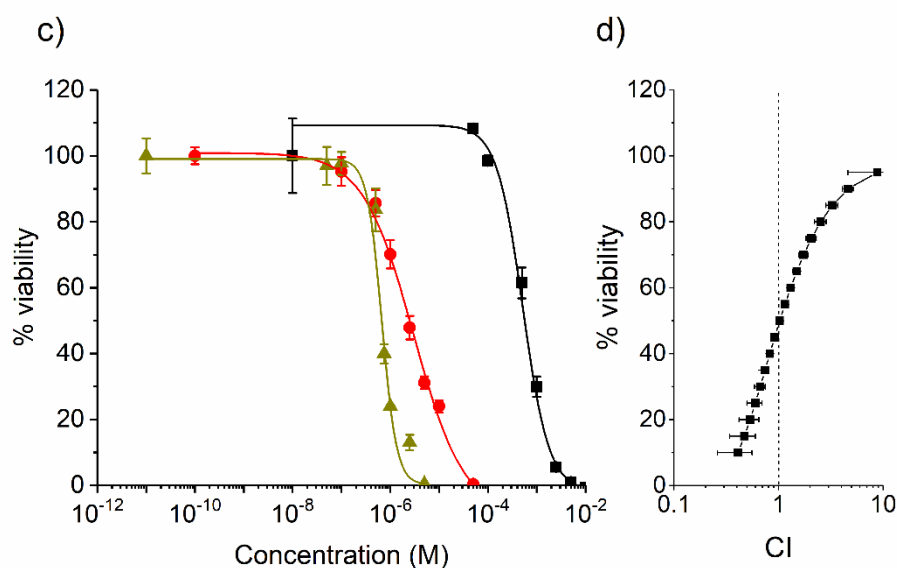

**Figure S15.** HCT116 cells were treated for 72 h with cisplatin (red dots), naproxen (black squares) or a cisplatin : naproxen mixture (in a fixed 1:500 ratio, according to their respective  $IC_{50}$  values, green triangles). c) Residual viability was assessed by means of the resazurin reduction assay and data were fitted with a four-parameter function. d) Residual viability data of the 1:500 mixture were compared to obtain the Combination Index (CI) value with the method of Chou and Talalay (equation for non-mutually exclusive drugs).

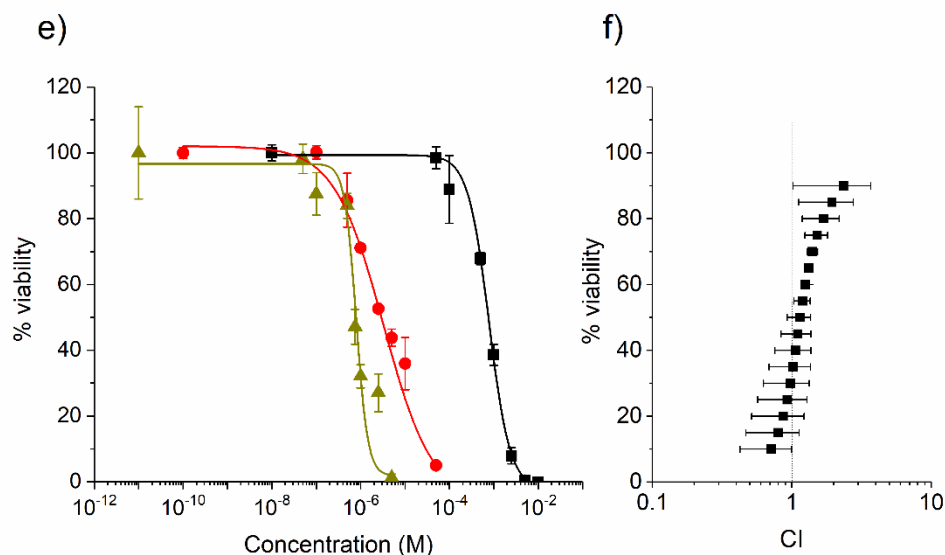

**Figure S16.** HT-29 cells were treated for 72 h with cisplatin (red dots), ketoprofen (black squares) or a cisplatin : ketoprofen mixture (in a fixed 1:500 ratio, according to their respective  $IC_{50}$  values, green triangles). e) Residual viability was assessed by means of the resazurin reduction assay and data were fitted with a four-parameter function. f) Residual viability data of the 1:500 mixture were compared to obtain the Combination Index (CI) value with the method of Chou and Talalay (equation for non-mutually exclusive drugs).

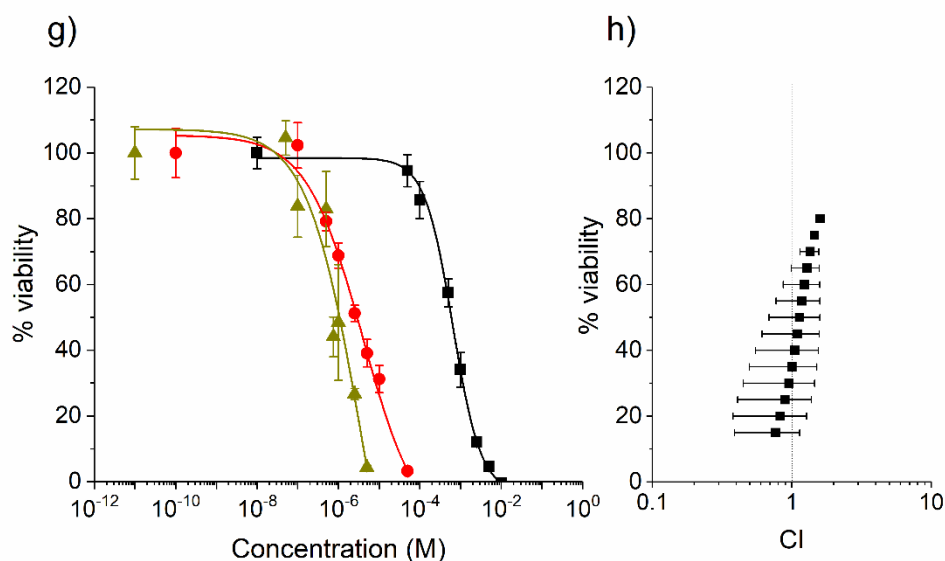

**Figure S17.** HT-29 cells were treated for 72 h with cisplatin (red dots), naproxen (black squares) or a cisplatin : naproxen mixture (in a fixed 1:500 ratio, according to their respective  $IC_{50}$  values, green triangles). g) Residual viability was assessed by means of the resazurin reduction assay and data were fitted with a four-parameter function. h) Residual viability data of the 1:500 mixture were compared to obtain the Combination Index (CI) value with the method of Chou and Talalay (equation for non-mutually exclusive drugs).

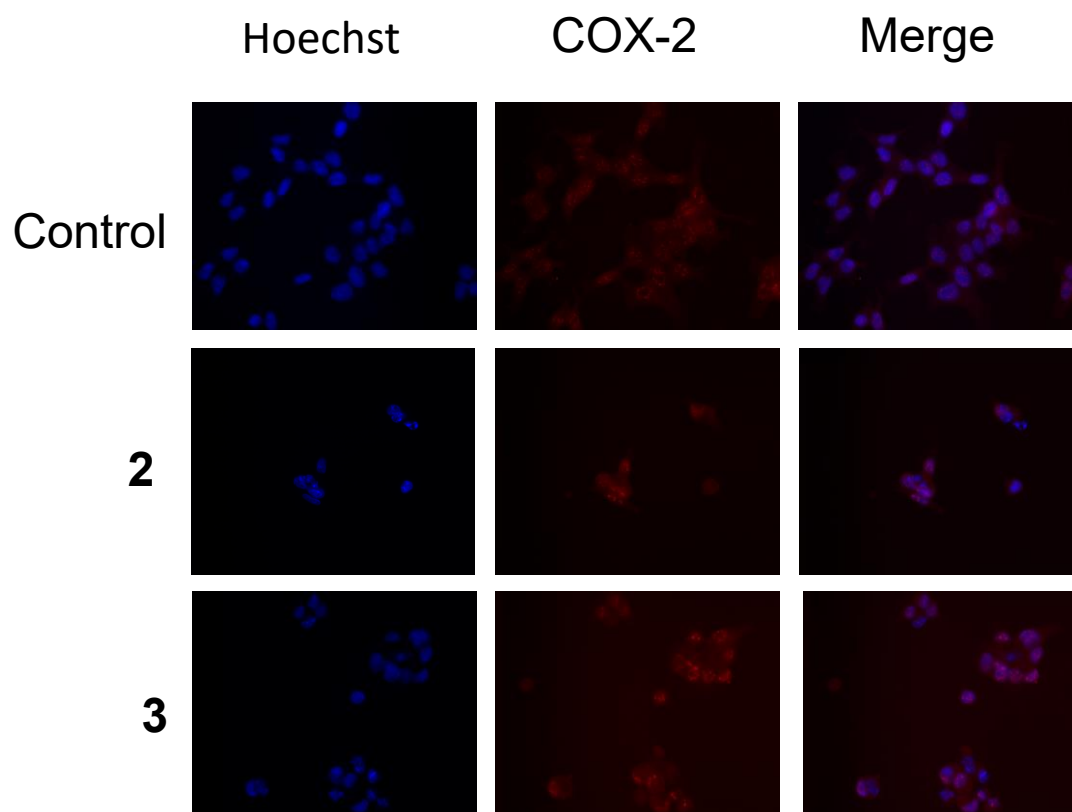

**Figure S18.** Representative pictures of HCT 116 cells 24 h after a 3  $\mu$ M treatment with **2** and **3** (from top to bottom: control, **2**, and **3**). Nuclei were stained with Hoechst 33258 (left), COX-2 was revealed with an Alexa 594-conjugated secondary antibody (middle), and images were merged (right). Pictures taken by means of Olympus BX51 microscope at 40 $\times$  magnification. (For the description of the experiments see note after Figure S19.)

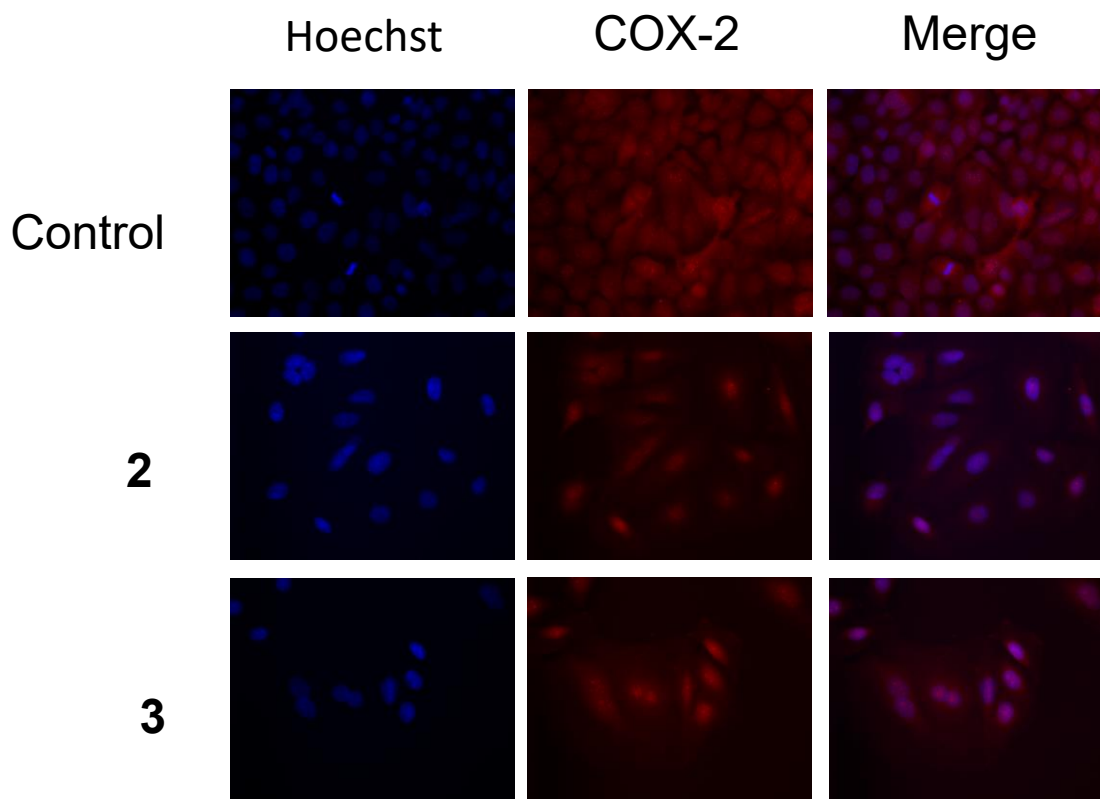

**Figure S19.** Representative pictures of A-549 cells 24 h after a 5  $\mu\text{M}$  treatment with **2** and **3** (from top to bottom: control, **2**, and **3**). Nuclei were stained with Hoechst 33258 (left), COX-2 was revealed with an Alexa 594-conjugated secondary antibody (middle), and images were merged (right). Pictures taken by means of Olympus BX51 microscope at 40 $\times$  magnification.

**Immunochemical analysis.** HCT 116 and A-549 cells ( $5 \times 10^5$ ) were seeded on coverslips and allowed to grow for 24 h. The cells were treated with equitoxic concentrations of the compounds under investigation (*i.e.*, HCT 116: 3  $\mu\text{M}$  for both complexes **2** and **3**; A-549: 5  $\mu\text{M}$  for both complexes **2** and **3**). After 24 h, the samples were fixed with 4% formalin and post-fixed with 70% ethanol at -20  $^{\circ}\text{C}$  for at least 24 h. After rehydration in PBS for 10 minutes, the cells were incubated with a primary antibody against COX-2 (Santa Cruz Biotechnology), at 1:200 dilution, for 60 min. Then, the coverslips were washed three times with PBS and incubated with Alexa 594-conjugated anti-goat secondary antibody (Molecular Probes) at 1:200 dilution. All the incubations were performed in the dark at room temperature. Finally, the sections were counterstained for DNA with 0.1  $\mu\text{g mL}^{-1}$  Hoechst 33258 (Sigma-Aldrich, Milano, Italy) for 10 minutes, washed with PBS, and mounted in a drop of Mowiol (Calbiochem, Inalco, Italy) for fluorescence microscopy analysis. An Olympus BX51 microscope equipped with a 100-W mercury lamp was used under the following conditions:

- for Hoechst 33258: 330–385 nm excitation filter, 400 nm dichroic mirror, and 420 nm barrier filter
- for Alexa 594: 540 nm excitation filter, 580 nm dichroic mirror, and 620 nm barrier filter.

Images were recorded with an Olympus MagniFire camera system and processed with the Olympus Cell F software.

**Table S1.** Genes analyzed by means of Quantitative Reverse Transcription PCR (RT-qPCR). The NCBI accession number is reported along with the 5'-3' sequence of the forward and reverse primer and the expected product length.

| Gene               | Accession no.  | Forward                | Reverse                | Product lenght (bp) |
|--------------------|----------------|------------------------|------------------------|---------------------|
| <b>COX-2</b>       | M90100.1       | CCCTGAGCATCTACGGTTTG   | CATCGCATACTCTGTTGTGTTC | 107                 |
| <b>GAPDH</b>       | NG_007073.2    | ATCCCTGAGCTGAACGGGAA   | GGCAGGTTTTTCTAGACGGC   | 99                  |
| <b>HPRT1</b>       | NM_000194.2    | TTGCTTTCCTTGGTCAGGCA   | ATCCAACACTTCGTGGGGTC   | 85                  |
| <b>RNA18SN1</b>    | NR_145820.1    | CGTCTGCCCTATCAACTTTTCG | TGCCTTCCTTGGATGTGGTAG  | 124                 |
| <b>BAX</b>         | NM_001291428.1 | GACCATCTTTGTGGCGGGAG   | GAGGAAAAACACAGTCCAAGGC | 94                  |
| <b>BAD</b>         | NM_004322.3    | GAGACCTGTGCGCCGTCA     | AGGACCTCAGTCTCCCCTCAG  | 74                  |
| <b>Bcl2a</b>       | NM_000633.2    | CTTTGAGTTCGGTGGGGTCA   | GGGCCGTACAGTTCCACAAA   | 162                 |
| <b>NAG-1/GDF15</b> | NM_004864.3    | TTGCGGAAACGCTACGAGG    | GCACTTCTGGCGTGAGTATCC  | 115                 |

↑↓
